# Supplementary material
Source: PubMed Central journal article supplement (PMC5198282)

**Supplementary Fig 1. Interstitial leukocyte infiltration during FA-AKI is modulated by Fer-1.** **A)** Fer-1 reduces the interstitial infiltration of CD3<sup>+</sup> lymphocytes and of MPO<sup>+</sup> neutrophils in AKI kidneys. Original magnification x200. Scale bars 50  $\mu$ m. Mean  $\pm$  SEM of 7 animals per group. \*\*p<0.002 vs control; #p<0.04 vs AKI alone; ###p<0.001 vs AKI alone. **B)** Quantification of kidney Foxp3 and IL-10 mRNA levels. Fer-1 prevented the increase in Foxp3 and IL-10 mRNA expression in AKI at 48h. Mean  $\pm$  SEM of 7 animals per group. \*\*p<0.008 vs control; ###p<0.002 vs AKI alone. **C)** Fer-1 also decreased number of kidney infiltrating Treg cells as assessed by Foxp3 staining. Original magnification x200. Scale bars 50  $\mu$ m. Mean  $\pm$  SEM of 7 animals per group. \*\*p<0.002 vs control.

**Supplementary Fig 2. zVAD and Nec-1 interfere with their target molecules.** **A)** Nec-1 prevented MLKL phosphorylation as assessed by western blot. **B)** zVAD prevented activation of caspases as assessed by immunohistochemistry of M30-cytodeath that binds to a caspase-generated cytokeratin fragment. Original magnification x200. Scale bars 50  $\mu$ m. Mean  $\pm$  SEM of 5 animals per group. \*\*p<0.002 vs control. ##p<0.002 vs AKI alone.

**Supplementary Fig 3. RIPK3-KO mice present reduce interstitial leukocyte infiltration during FA-AKI.** **A)** Quantification of kidney IL-10 mRNA levels in WT (n=7), RIPK3-KO (n=8) and MLKL-KO (n=4, 6) mice with AKI at 48h. Mean  $\pm$  SEM of 4-8 animals per group. \*\*p<0.003 vs control; \*p<0.03 vs control; #p<0.02 vs AKI WT. **B)** RIPK3-KO show reduced interstitial infiltration of CD3<sup>+</sup> lymphocytes and of MPO<sup>+</sup> neutrophils in AKI. Original magnification x200. Scale bars 50  $\mu$ m. Mean  $\pm$  SEM of 7-8 animals per group. \*\*p<0.006 vs control; #p<0.03 vs AKI alone; #p<0.04 vs AKI alone. **C)** Quantification of Foxp3 mRNA expression and Treg infiltrates, assessed by Foxp3 staining, in RIPK3-KO and WT mice with AKI. Mean  $\pm$  SEM of 7-8 animals per group. \*\*p<0.006 vs control; \*p<0.05 vs control. **D)** Ratio of Tregs versus other leukocyte populations in WT and RIPK3-KO mice with AKI. Data expressed as fold-change over WT AKI. Mean  $\pm$  SEM of 7-8 animals per group. \*p<0.04 vs WT mice.

**Supplementary Fig 4. Neither apoptosis nor necroptosis inhibitors nor MLKL deficiency prevented renal inflammation in folic acid-induced AKI. A, B)** Neither zVAD nor necrostatin-1 prevented the upregulation of kidney Fn14 (**A**) and MCP-1 (**B**) mRNA levels in AKI at 48 hours. Mean  $\pm$  SEM of 7 animals per group. \*\*p<0.001 vs control; \*p<0.01 vs control. **C, D)** MLKL deficiency did not prevent kidney Fn14 (**C**) and MCP-1 (**D**) mRNA upregulation in AKI at 48 hours. Mean  $\pm$  SEM of 4-6 animals per group. \*p<0.001 vs control

Supplementary figure 1

A)

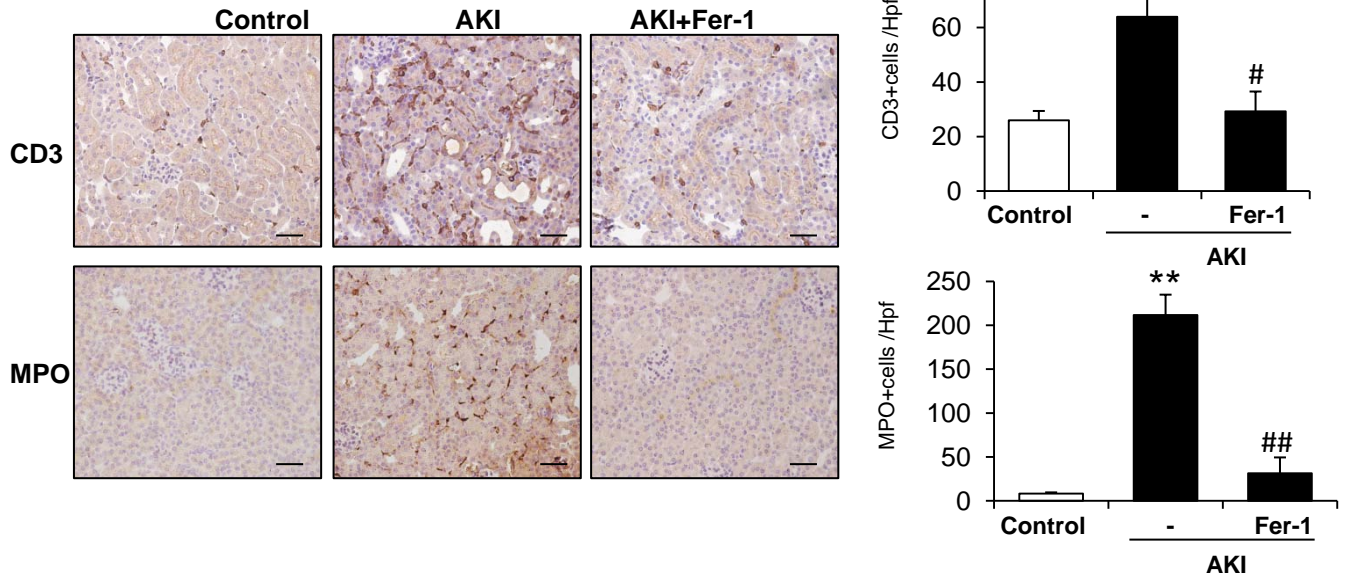

B)

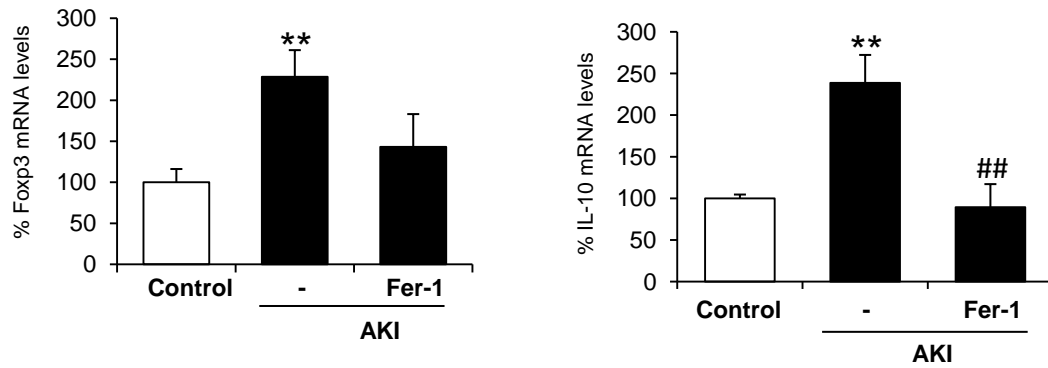

C)

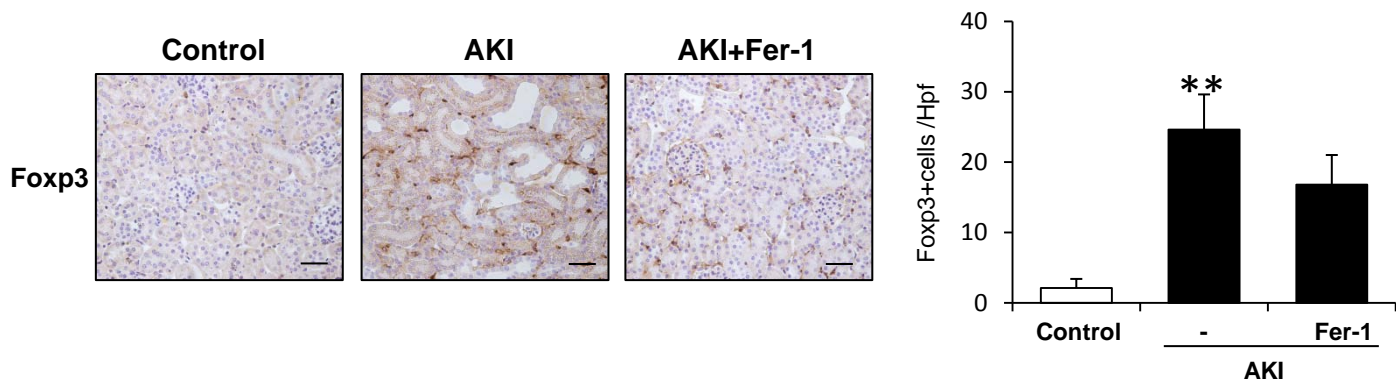

Supplementary figure 2

A)

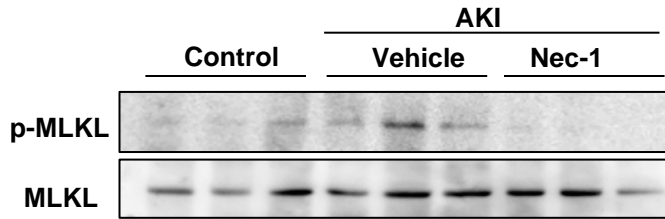

B)

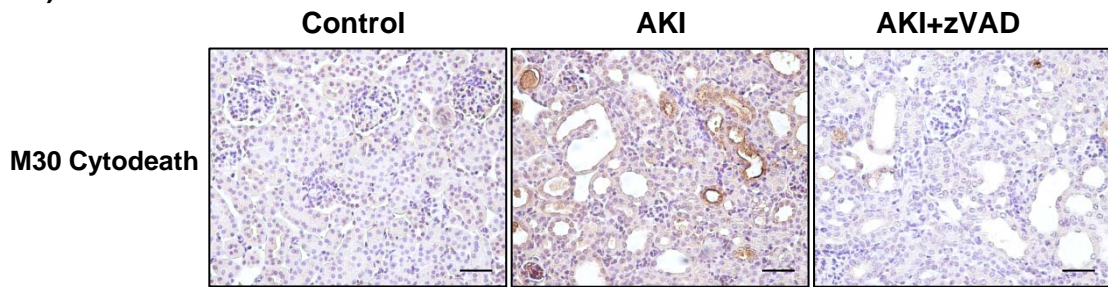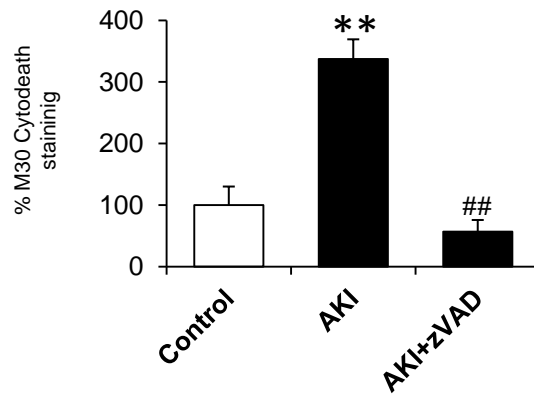

Supplementary figure 3

A)

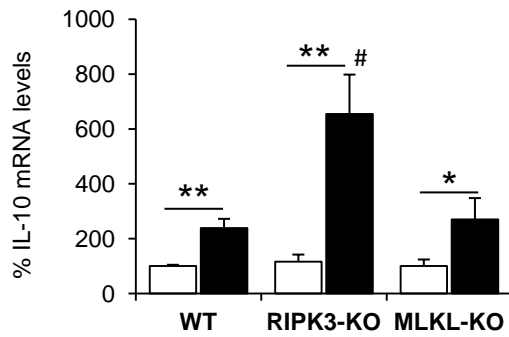

B)

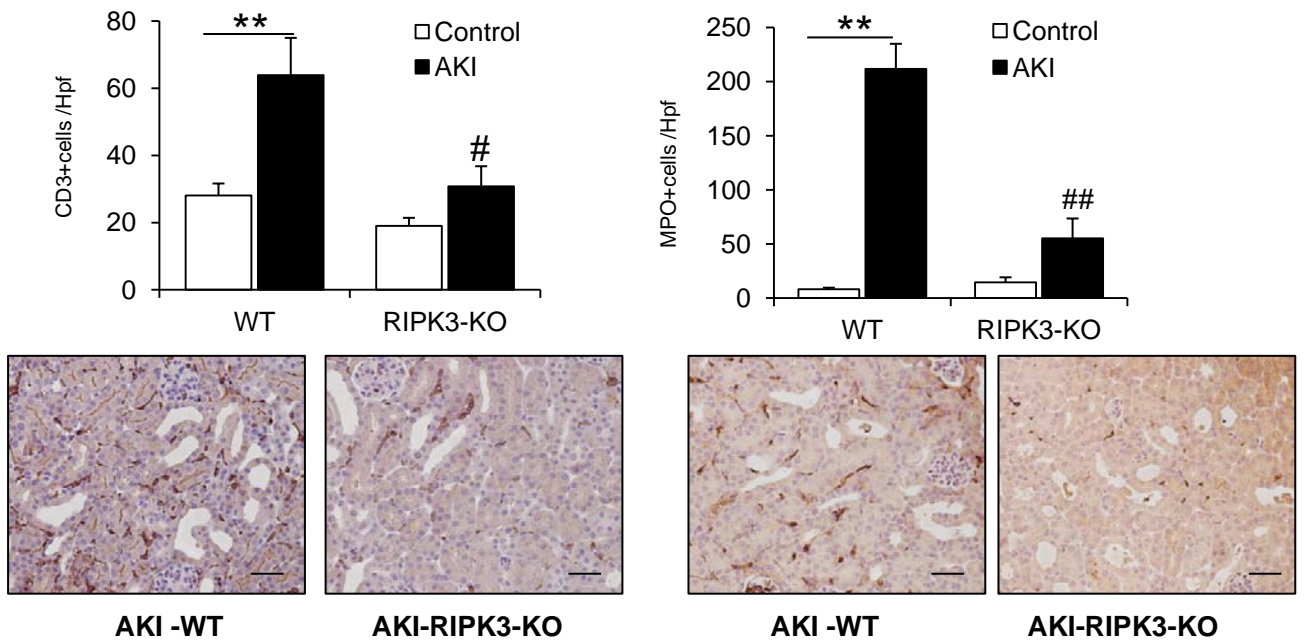

C)

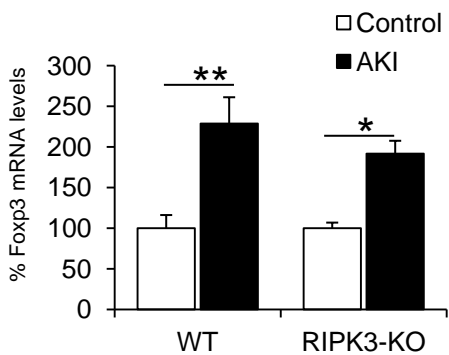

D)

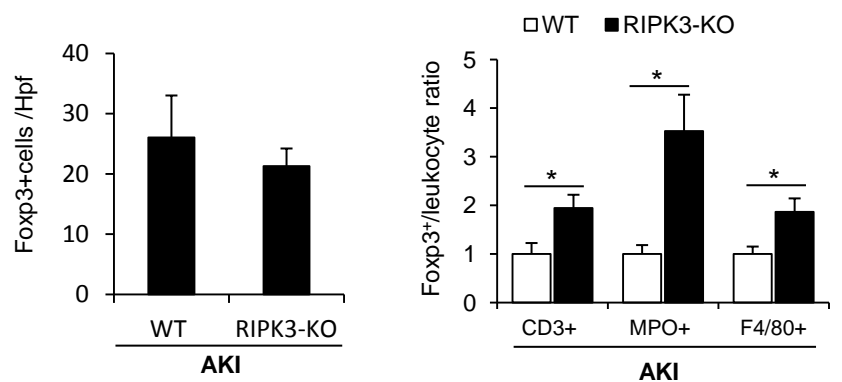

### Supplementary figure 4

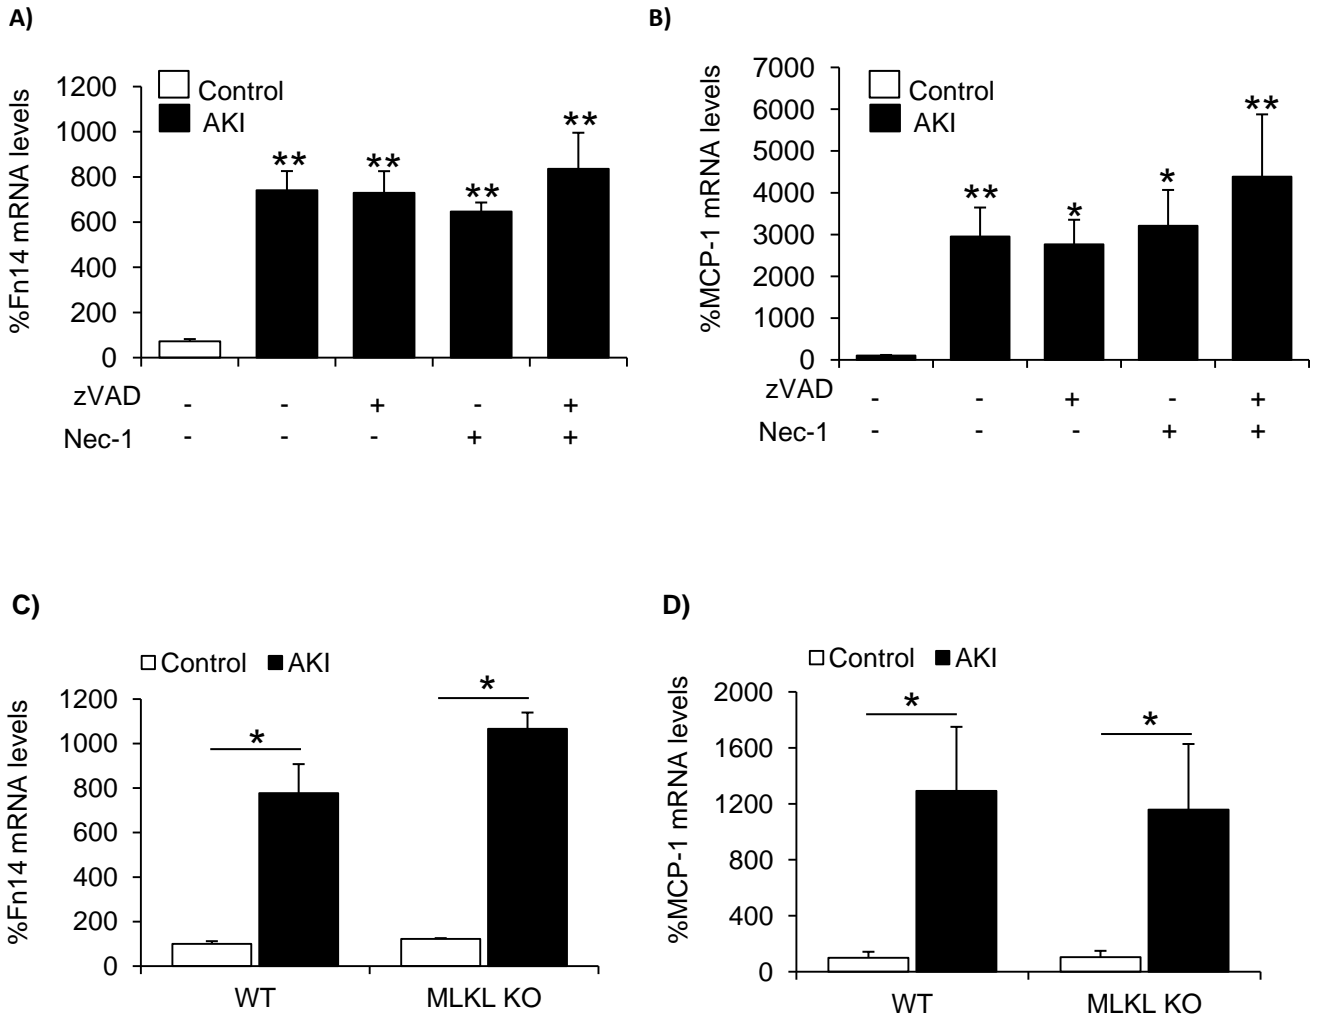

Supplement: ASN.2015121376SupplementaryData.pdf [file ASN.2015121376SupplementaryData.pdf]
